# Supplementary material for: A cost-effective and environmentally sustainable process for phycoremediation of oil field formation water for its safe disposal and reuse
Source: PubMed Central journal article supplement (PMC6811566; doi:10.1038/s41598-019-51806-5), 2019-10-23
Supplement: 41598_2019_51806_MOESM1_ESM.pdf [file 41598_2019_51806_MOESM1_ESM.pdf]

**A cost-effective and environmentally sustainable process for phycoremediation  
of oil field formation water for its safe disposal and reuse**

**Bhaskar Das , Suresh Deka**

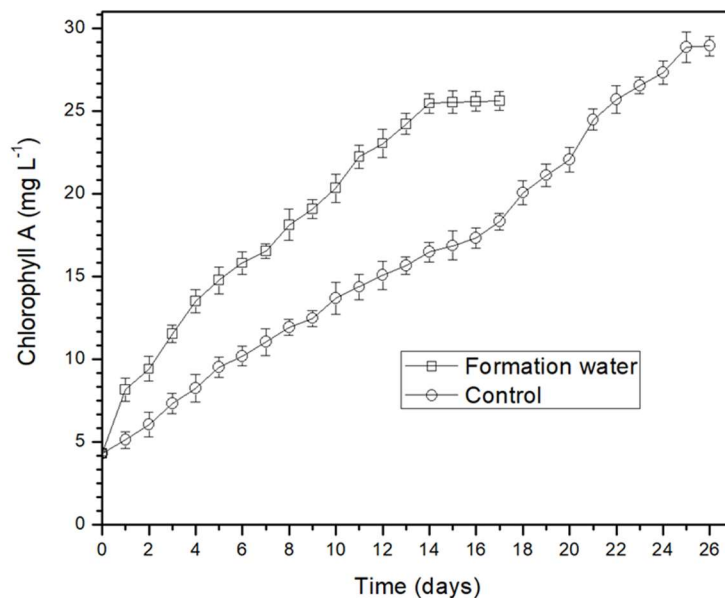

**Supplementary Figure 1.** Chlorophyll profile of *Chlorella vulgaris* BS1 cultivated in oil field formation water and control cultures.

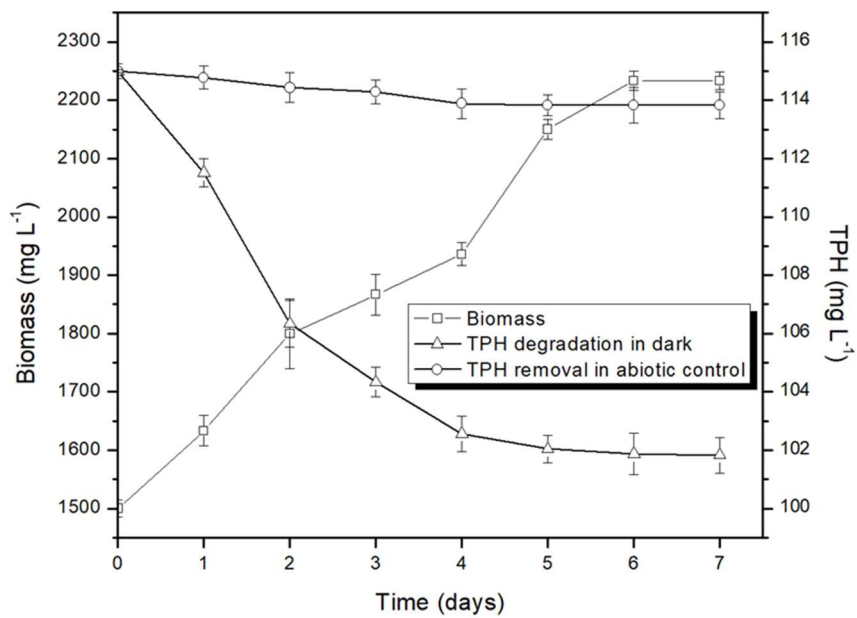

**Supplementary Figure 2** Biomass growth and TPH degradation profile of *Chlorella vulgaris* BS1 in dark

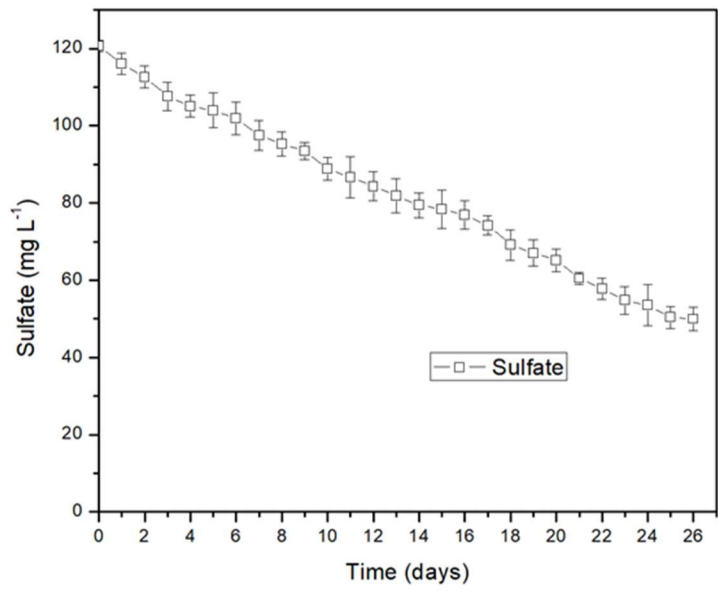

**Supplementary Figure 3.** Sulfate uptake profile of *Chlorella vulgaris* BS1 in control culture.

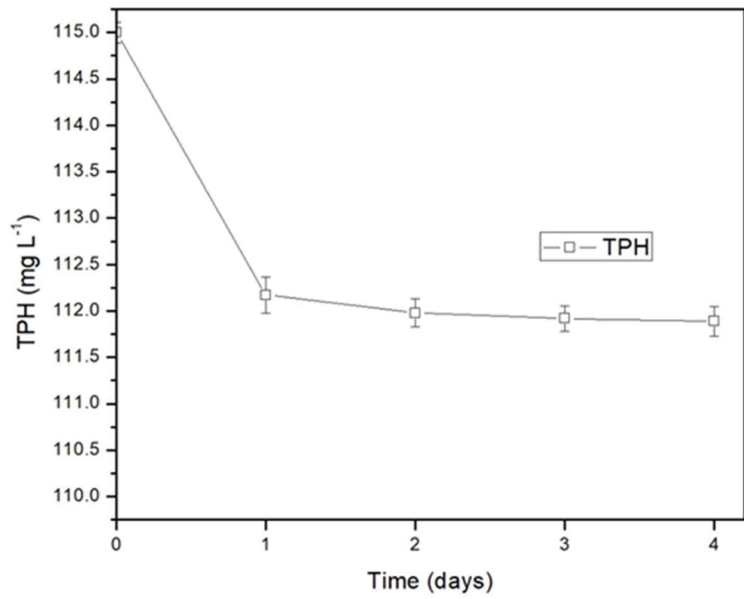

**Supplementary Figure 4** TPH sorption by dead biomass of *Chlorella vulgaris* BS1

**Supplementary Table 1.** Estimates of evolutionary divergence between sequences

|                  |       |       |       |       |       |       |       |       |       |       |       |
|------------------|-------|-------|-------|-------|-------|-------|-------|-------|-------|-------|-------|
| <b>Sample_P3</b> |       | 0.001 | 0.001 | 0.001 | 0.001 | 0.002 | 0.002 | 0.002 | 0.002 | 0.002 | 0.002 |
| FR865683.1       | 0.002 |       | 0.000 | 0.000 | 0.000 | 0.001 | 0.001 | 0.001 | 0.001 | 0.001 | 0.001 |
| HQ111432.1       | 0.002 | 0.000 |       | 0.000 | 0.000 | 0.001 | 0.001 | 0.001 | 0.001 | 0.001 | 0.001 |
| GQ487225.1       | 0.002 | 0.000 | 0.000 |       | 0.000 | 0.001 | 0.001 | 0.001 | 0.001 | 0.001 | 0.001 |
| GQ487223.1       | 0.002 | 0.000 | 0.000 | 0.000 |       | 0.001 | 0.001 | 0.001 | 0.001 | 0.001 | 0.001 |
| KY364701.1       | 0.003 | 0.001 | 0.001 | 0.001 | 0.001 |       | 0.001 | 0.001 | 0.001 | 0.001 | 0.001 |
| KP726221.1       | 0.003 | 0.001 | 0.001 | 0.001 | 0.001 | 0.002 |       | 0.000 | 0.001 | 0.001 | 0.001 |
| LK021940.1       | 0.003 | 0.001 | 0.001 | 0.001 | 0.001 | 0.002 | 0.000 |       | 0.001 | 0.001 | 0.001 |
| HQ111435.1       | 0.003 | 0.001 | 0.001 | 0.001 | 0.001 | 0.002 | 0.002 | 0.002 |       | 0.001 | 0.001 |
| HQ111434.1       | 0.003 | 0.001 | 0.001 | 0.001 | 0.001 | 0.002 | 0.002 | 0.002 | 0.002 |       | 0.001 |
| GQ867590.1       | 0.003 | 0.001 | 0.001 | 0.001 | 0.001 | 0.002 | 0.002 | 0.002 | 0.002 | 0.002 |       |

**Supplementary Table 2.** Residual TPH concentration ( $\text{mg L}^{-1}$ ) in formation water after treatment with *Chlorella vulgaris* BS1

| Inoculum<br>(mg/l) | Incubation time<br>( days)  |                                |                                |
|--------------------|-----------------------------|--------------------------------|--------------------------------|
|                    | 0                           | 7                              | 14                             |
|                    | 500                         | 115 $\pm$ 0.12 <sup>a</sup>    | 90.04 $\pm$ 0.23 <sup>b</sup>  |
| 1000               | 115 $\pm$ 0.15 <sup>a</sup> | 75.9 $\pm$ 0.32 <sup>d</sup>   | 25.13 $\pm$ 0.27 <sup>e</sup>  |
| 1500               | 115 $\pm$ 0.11 <sup>a</sup> | 59.93 $\pm$ 0.16 <sup>f</sup>  | 0.04 $\pm$ 0.12 <sup>g</sup>   |
| 2000               | 115 $\pm$ 0.17 <sup>a</sup> | 66.48 $\pm$ 0.34 <sup>h</sup>  | 5.81 $\pm$ 0.13 <sup>i</sup>   |
| Abiotic Control    | 115 $\pm$ 0.18 <sup>a</sup> | 113.68 $\pm$ 0.14 <sup>j</sup> | 113.46 $\pm$ 0.29 <sup>j</sup> |

TPH degradation values are average of three replicates and described in terms of residual TPH concentration ( $\text{mg L}^{-1}$ ). Different alphabets (a to j) as prefix of Mean  $\pm$  SD values in the same row and column denote statistically significant differences as per Turkey HSD p-value ( $p < 0.01$ ) while same alphabets in the same row or column indicates no significant difference as per Turkey HSD p-value (Turkey HSD inference  $p < 0.01$ )

**Supplementary Table 3.** Comparison of TPH profile in oil field formation water treated with *Chlorella vulgaris* BS1 and untreated abiotic control

| <b>Compounds</b>                  | <b>Retention Time<br/>(min)</b> | <b>Molecular<br/>formula</b>      | <b>Molar Mass<br/>(g mol<sup>-1</sup>)</b> | <b>Abiotic control<br/>formation water<br/>after 14 days<br/>incubation (%)</b> | <b>Formation water<br/>treated for 14 days<br/>by <i>Chlorella<br/>vulgaris</i> BS1 (%)</b> |
|-----------------------------------|---------------------------------|-----------------------------------|--------------------------------------------|---------------------------------------------------------------------------------|---------------------------------------------------------------------------------------------|
| Dodecane                          | 13.305                          | C <sub>12</sub> H <sub>26</sub>   | 170.34                                     | 0.09                                                                            | Not Detected                                                                                |
| Decane, 1,1'-oxybis-              | 14.802                          | C <sub>20</sub> H <sub>42</sub> O | 298.5469                                   | 0.07                                                                            | Not Detected                                                                                |
| 11-Methyldodecanol                | 15.249                          | C <sub>13</sub> H <sub>28</sub> O | 207.409                                    | 1.14                                                                            | Not Detected                                                                                |
| Tetradecane                       | 16.664                          | C <sub>14</sub> H <sub>30</sub>   | 198.394                                    | 0.85                                                                            | Not Detected                                                                                |
| 1-Dodecanol                       | 17.761                          | C <sub>12</sub> H <sub>26</sub> O | 186.339                                    | 6.15                                                                            | Not Detected                                                                                |
| Eicosane                          | 18.048                          | C <sub>20</sub> H <sub>42</sub>   | 282.556                                    | 0.18                                                                            | Not Detected                                                                                |
| Pentadecane                       | 18.165                          | C <sub>15</sub> H <sub>32</sub>   | 212.421                                    | 0.65                                                                            | Not Detected                                                                                |
| Phenol, 2,4-bis(1,1-dimethylethyl | 18.288                          | C <sub>14</sub> H <sub>22</sub> O | 206.329                                    | 7.42                                                                            | Not Detected                                                                                |
| 1-Decanol, 2-hexyl-               | 18.592                          | C <sub>16</sub> H <sub>34</sub> O | 242.447                                    | 0.92                                                                            | Not Detected                                                                                |
| 2,4-Dimethyldodecane              | 18.906                          | C <sub>14</sub> H <sub>30</sub>   | 198.394                                    | 0.11                                                                            | Not Detected                                                                                |
| Heptadecane                       | 19.070                          | C <sub>17</sub> H <sub>36</sub>   | 240.475                                    | 2.93                                                                            | Not Detected                                                                                |
| Pentadecane, 8-hexyl-             | 19.175                          | C <sub>21</sub> H <sub>44</sub>   | 296.583                                    | 0.35                                                                            | Not Detected                                                                                |
| Heptadecane, 8-methyl-            | 20.185                          | C <sub>18</sub> H <sub>38</sub>   | 254.502                                    | 0.13                                                                            | Not Detected                                                                                |
| Hentriacontane                    | 20.223                          | C <sub>31</sub> H <sub>64</sub>   | 436.853                                    | 0.51                                                                            | Not Detected                                                                                |

|                                         |        |                                                               |          |      |              |
|-----------------------------------------|--------|---------------------------------------------------------------|----------|------|--------------|
| Dodecane, 4-methyl-                     | 20.357 | C <sub>13</sub> H <sub>28</sub>                               | 184.367  | 0.34 | Not Detected |
| Heneicosane                             | 20.432 | C <sub>21</sub> H <sub>44</sub>                               | 296.583  | 0.48 | Not Detected |
| Heptadecane, 2-methyl-                  | 20.537 | C <sub>18</sub> H <sub>38</sub>                               | 254.502  | 0.43 | Not Detected |
| Tetrapentacontane                       | 20.699 | C <sub>54</sub> H <sub>110</sub>                              | 759.474  | 0.70 | Not Detected |
| Hexadecane                              | 20.975 | C <sub>16</sub> H <sub>34</sub>                               | 226.448  | 3.02 | Not Detected |
| 2-methylhexacosane                      | 21.213 | C <sub>27</sub> H <sub>56</sub>                               | 380.745  | 0.42 | Not Detected |
| Tetrapentacontane, 1,54-dibromo         | 21.272 | C <sub>54</sub> H <sub>108</sub> Br <sub>2</sub>              | 917.266  | 0.48 | Not Detected |
| Nonahexacontanoic acid                  | 21.574 | C <sub>69</sub> H <sub>138</sub> O <sub>2</sub>               | 999.861  | 1.07 | Not Detected |
| Heneicosane                             | 22.189 | C <sub>21</sub> H <sub>44</sub>                               | 296.583  | 3.39 | Not Detected |
| 2-methylhexacosane                      | 22.444 | C <sub>27</sub> H <sub>56</sub>                               | 380.745  | 0.56 | Not Detected |
| Hexadecane, 1-iodo-                     | 22.959 | C <sub>16</sub> H <sub>33</sub> I                             | 352.344  | 0.19 | Not Detected |
| Cyclohexane, (1-octylonyl)-             | 23.054 | C <sub>23</sub> H <sub>46</sub>                               | 322.6113 | 0.45 | Not Detected |
| 5,5,7,7-Tetraethylundecane              | 23.224 | C <sub>19</sub> H <sub>40</sub>                               | 268.529  | 0.12 | Not Detected |
| Nonane, 5-(2-methylpropyl)-             | 23.534 | C <sub>13</sub> H <sub>28</sub>                               | 184.367  | 0.12 | Not Detected |
| Hexatriacontyl<br>pentafluoropropionate | 24.935 | C <sub>39</sub> H <sub>73</sub> F <sub>5</sub> O <sub>2</sub> | 668.9877 | 0.26 | Not Detected |
| Heptadecane, 4-methyl-                  | 25.203 | C <sub>18</sub> H <sub>38</sub>                               | 254.502  | 0.20 | Not Detected |
| Dodecylcyclohexane                      | 25.441 | C <sub>18</sub> H <sub>36</sub>                               | 252.486  | 0.10 | Not Detected |
| Sulfurous acid, cyclohexylmethyl        | 25.892 | C <sub>13</sub> H <sub>26</sub> O <sub>3</sub> S              | 276.44   | 0.07 | Not Detected |

|                                     |        |                                                               |          |      |              |
|-------------------------------------|--------|---------------------------------------------------------------|----------|------|--------------|
| 2-methylhexacosane                  | 25.983 | C <sub>27</sub> H <sub>56</sub>                               | 380.745  | 0.56 | Not Detected |
| Octadecanoic acid                   | 26.313 | C <sub>18</sub> H <sub>36</sub> O <sub>2</sub>                | 284.484  | 2.29 | Not Detected |
| Hexacontane                         | 26.438 | C <sub>60</sub> H <sub>122</sub>                              | 843.636  | 0.43 | Not Detected |
| 1-Hentetracontanol                  | 26.555 | C <sub>41</sub> H <sub>84</sub> O                             | 593.122  | 0.44 | Not Detected |
| Octatriacontyl trifluoroacetate     | 26.824 | C <sub>40</sub> H <sub>77</sub> F <sub>3</sub> O <sub>2</sub> | 647.049  | 0.14 | Not Detected |
| 1-Naphthalenamine, N-phenyl-        | 27.234 | C <sub>16</sub> H <sub>13</sub> N                             | 219.287  | 2.81 | Not Detected |
| Cyclohexane, decyl-                 | 27.618 | C <sub>16</sub> H <sub>32</sub>                               | 224.432  | 0.06 | Not Detected |
| Nonadecane, 2,6,10,14-tetram        | 27.889 | C <sub>22</sub> H <sub>46</sub>                               | 310.61   | 0.20 | Not Detected |
| 4-Methyldocosane                    | 27.985 | C <sub>23</sub> H <sub>48</sub>                               | 324.637  | 0.17 | Not Detected |
| Hexanedioic acid, bis(2-ethylhexyl  | 28.600 | C <sub>22</sub> H <sub>42</sub> O <sub>4</sub>                | 370.574  | 0.10 | Not Detected |
| Dotriacontane                       | 28.727 | C <sub>32</sub> H <sub>66</sub>                               | 450.88   | 1.6  | Not Detected |
| 2-Nonadecanone, O-methyloxime       | 29.270 | C <sub>20</sub> H <sub>41</sub> NO                            | 311.554  | 0.08 | Not Detected |
| Octadecane, 3-ethyl-5-(2-ethylbutyl | 29.731 | C <sub>26</sub> H <sub>54</sub>                               | 366.718  | 0.11 | Not Detected |
| Bis(2-ethylhexyl) phthalate         | 29.972 | C <sub>24</sub> H <sub>38</sub> O <sub>4</sub>                | 390.564  | 0.64 | Not Detected |
| 5,5-Diethylheptadecane              | 30.088 | C <sub>21</sub> H <sub>44</sub>                               | 296.5741 | 0.33 | Not Detected |
| 5,5-Diethylpentadecane              | 31.900 | C <sub>19</sub> H <sub>40</sub>                               | 268.52   | 0.11 | Not Detected |
| Tetracosane                         | 32.297 | C <sub>24</sub> H <sub>50</sub>                               | 338.6538 | 0.25 | Not Detected |
| Hexadecanoic acid, tetradecyl       | 33.774 | C <sub>30</sub> H <sub>60</sub> O <sub>2</sub>                | 452.808  | 0.80 | Not Detected |

---
